# Supplementary material for: Ultra-High Hydrostatic Pressure Pretreatment on White Que Zui Tea: Chemical Constituents, Antioxidant, Cytoprotective, and Anti-Inflammatory Activities
Source: MDPI journal article supplement (doi:10.3390/foods12030628), 2023-02-01
Supplement: s1 [file s1]

**Table S1.** The compounds identified in different fractions from White Que Zui tea (WQT) by quasi-targeted metabolomics analysis.

| Peak | Name                            | Formula                                                       | Molecular Weight | RT [min] | Class            | CAS           | FP       | EP      | IBP     | UFP      | UEP     | UIBP    |
|------|---------------------------------|---------------------------------------------------------------|------------------|----------|------------------|---------------|----------|---------|---------|----------|---------|---------|
| 1    | Dimethylmalonic acid            | C <sub>5</sub> H <sub>8</sub> O <sub>4</sub>                  | 132.042          | 0.67     | Organic Acids    | "595-46-0"    | 558400   | 3748000 | 1303000 | 847100   | 1661000 | 1975000 |
| 2    | Afzelechin                      | C <sub>15</sub> H <sub>14</sub> O <sub>5</sub>                | 274.084          | 0.68     | Flavonoids       | "2545-00-8"   | 113800   | 278100  | 57160   | 162300   | 59500   | 109900  |
| 3    | 2-O-Caffeoylmalic acid          | C <sub>15</sub> H <sub>12</sub> O <sub>8</sub>                | 296.053          | 0.69     | Polyphenol       | "53755-04-7"  | 25190    | 144300  | 39680   | 39540    | 28230   | 52060   |
| 4    | 6'-O-Feruloyl-D-sucrose         | C <sub>22</sub> H <sub>30</sub> O <sub>14</sub>               | 518.164          | 0.69     | Polyphenol       | "118230-77-6" | 79780    | 562600  | 79630   | 287200   | 87060   | 145900  |
| 5    | Oxalacetic acid                 | C <sub>4</sub> H <sub>4</sub> O <sub>5</sub>                  | 132.07           | 0.69     | Organic Acids    | "328-42-7"    | 458600   | 2416000 | 850500  | 668600   | 1248000 | 1366000 |
| 6    | 3-Phenylpropanoic acid          | C <sub>9</sub> H <sub>10</sub> O <sub>2</sub>                 | 150.174          | 0.7      | Phenylpropanoids | "501-52-0"    | 252300   | 228300  | 130800  | 308900   | 161400  | 291100  |
| 7    | Kuwanon A                       | C <sub>25</sub> H <sub>24</sub> O <sub>6</sub>                | 420.454          | 0.7      | Flavonoids       | "62949-77-3"  | 12450    | 246700  | 22130   | 21630    | 32940   | 50170   |
| 8    | Melittoside                     | C <sub>21</sub> H <sub>32</sub> O <sub>15</sub>               | 524.47           | 0.7      | Terpenoids       | "19467-03-9"  | 28281    | 221200  | 14940   | 1900     | 16330   | 27980   |
| 9    | 4-Hydroxy-2-Oxoglutaric Acid    | C <sub>5</sub> H <sub>8</sub> O <sub>6</sub>                  | 162.098          | 0.7      | Organic Acids    | "1187-99-1"   | 661000   | 1510000 | 568600  | 1164000  | 512400  | 944900  |
| 10   | Glutaric Acid                   | C <sub>5</sub> H <sub>8</sub> O <sub>4</sub>                  | 132.115          | 0.7      | Organic Acids    | "110-94-1"    | 667200   | 3870000 | 1318000 | 876700   | 1787000 | 2005000 |
| 11   | alpha-Benzylsuccinic acid       | C <sub>11</sub> H <sub>12</sub> O <sub>4</sub>                | 208.211          | 0.71     | Organic Acids    | "884-33-3"    | 132300   | 1059000 | 324300  | 178700   | 354700  | 546200  |
| 12   | 2-Oxoadipic acid                | C <sub>8</sub> H <sub>8</sub> O <sub>5</sub>                  | 160.037          | 0.72     | Organic Acids    | "3184-35-8"   | 902200   | 1428000 | 681200  | 1110000  | 541800  | 800000  |
| 13   | 6-Sialyllactose                 | C <sub>23</sub> H <sub>39</sub> NO <sub>19</sub>              | 633.551          | 0.73     | Carbohydrates    | "35890-39-2"  | 12630    | 23950   | 8636    | 42540    | 11544   | 6885    |
| 14   | D-Glucarate                     | C <sub>6</sub> H <sub>10</sub> O <sub>8</sub>                 | 210.139          | 0.82     | Carbohydrates    | "87-73-0"     | 618700   | 202200  | 57960   | 713500   | 169000  | 193500  |
| 15   | 3-Ureidopropionate              | C <sub>8</sub> H <sub>8</sub> N <sub>2</sub> O <sub>3</sub>   | 132.053          | 0.82     | Organic Acids    | "462-88-4"    | 438600   | 42310   | 47156   | 811300   | 14730   | 140648  |
| 16   | Ribose 5-phosphate              | C <sub>5</sub> H <sub>11</sub> O <sub>8</sub> P               | 230.02           | 0.84     | Carbohydrates    | "4300-28-1"   | 249800   | 23510   | 71550   | 384300   | 29040   | 70090   |
| 17   | 2,2-Dimethylsuccinic acid       | C <sub>8</sub> H <sub>10</sub> O <sub>4</sub>                 | 146.058          | 0.84     | Organic Acids    | "597-43-3"    | 18300    | 5611    | 4009    | 24830    | 2392    | 6775    |
| 18   | Sorbitol 6-phosphate            | C <sub>6</sub> H <sub>13</sub> O <sub>9</sub> P               | 262.045          | 0.86     | Carbohydrates    | "20479-58-7"  | 1076000  | 215800  | 88660   | 1074000  | 149200  | 37390   |
| 19   | D-Glucose 6-phosphate           | C <sub>6</sub> H <sub>13</sub> O <sub>9</sub> P               | 260.03           | 0.86     | Carbohydrates    | "56-73-5"     | 12480000 | 558200  | 203400  | 20850000 | 889600  | 252400  |
| 20   | D-Fructose 6-Phosphate          | C <sub>6</sub> H <sub>13</sub> O <sub>9</sub> P               | 260.136          | 0.86     | Carbohydrates    | "643-13-0"    | 35970000 | 1069000 | 498800  | 54380000 | 2121000 | 561800  |
| 21   | O-Phosphorylethanolamine        | C <sub>2</sub> H <sub>8</sub> NO <sub>4</sub> P               | 141.063          | 0.86     | Organic Acids    | "1071-23-4"   | 506600   | 11250   | 11150   | 542700   | 62171   | 8025    |
| 22   | Adipic acid                     | C <sub>8</sub> H <sub>10</sub> O <sub>4</sub>                 | 146.058          | 0.86     | Organic Acids    | "124-04-9"    | 84790    | 64300   | 111800  | 134700   | 115200  | 103200  |
| 23   | D-Mannose 6-phosphate           | C <sub>6</sub> H <sub>13</sub> O <sub>9</sub> P               | 260.136          | 0.87     | Carbohydrates    | "723729-16-6" | 624500   | 35420   | 8364    | 914500   | 56390   | 12280   |
| 24   | alpha-D-Galactose 1-phosphate   | C <sub>6</sub> H <sub>13</sub> O <sub>9</sub> P               | 260.136          | 0.87     | Carbohydrates    | "2255-14-3"   | 24680000 | 600900  | 113000  | 26870000 | 669200  | 451200  |
| 25   | D-Galactaric acid               | C <sub>6</sub> H <sub>10</sub> O <sub>8</sub>                 | 210.038          | 0.87     | Carbohydrates    | "526-99-8"    | 2126000  | 933800  | 253900  | 2221000  | 683600  | 761600  |
| 26   | D-Glucopyranose                 | C <sub>6</sub> H <sub>12</sub> O <sub>6</sub>                 | 180.156          | 0.87     | Carbohydrates    | "28905-12-6"  | 427900   | 1303000 | 258000  | 463800   | 1047000 | 432200  |
| 27   | s7p                             | C <sub>7</sub> H <sub>13</sub> BaO <sub>10</sub> P            | 425.473          | 0.87     | Carbohydrates    | "2646-35-7"   | 4392000  | 1443000 | 91610   | 4727000  | 1056000 | 214100  |
| 28   | Ligustrazine                    | C <sub>8</sub> H <sub>17</sub> N <sub>5</sub>                 | 136.197          | 0.88     | Alkaloids        | "1124-11-4"   | 1622000  | 1017000 | 316800  | 1861000  | 1199000 | 321100  |
| 29   | D-Fructose 1,6-bisphosphate     | C <sub>6</sub> H <sub>14</sub> O <sub>12</sub> P <sub>2</sub> | 340.116          | 0.88     | Carbohydrates    | "488-69-7"    | 121700   | 31600   | 78150   | 151400   | 84750   | 34730   |
| 30   | Succinic anhydride              | C <sub>4</sub> H <sub>4</sub> O <sub>3</sub>                  | 100.073          | 0.88     | Organic Acids    | "108-30-5"    | 23810000 | 8591000 | 603700  | 31940000 | 3713000 | 1099000 |
| 31   | Cinnamyl acetate                | C <sub>11</sub> H <sub>12</sub> O <sub>2</sub>                | 176.21           | 0.89     | Phenylpropanoids | "103-54-8"    | 229200   | 321800  | 49410   | 281700   | 351700  | 124500  |
| 32   | L-Sorbose                       | C <sub>6</sub> H <sub>12</sub> O <sub>6</sub>                 | 180.16           | 0.89     | Carbohydrates    | "87-79-6"     | 326300   | 137200  | 39680   | 470000   | 159000  | 62420   |
| 33   | D-Ribose 5-phosphate            | C <sub>5</sub> H <sub>11</sub> O <sub>8</sub> P               | 230.11           | 0.89     | Organic Acids    | "207671-46-3" | 1732000  | 106400  | 218100  | 2381000  | 186700  | 253300  |
| 34   | D-Glucuronic acid               | C <sub>6</sub> H <sub>10</sub> O <sub>7</sub>                 | 194.14           | 0.894    | Carbohydrates    | "6556-12-3"   | 201300   | 222400  | 179900  | 173000   | 260300  | 254600  |
| 35   | Ribose 1-phosphate              | C <sub>5</sub> H <sub>11</sub> O <sub>8</sub> P               | 230.11           | 0.9      | Carbohydrates    | "14075-00-4"  | 530100   | 23670   | 849200  | 612000   | 34270   | 982000  |
| 36   | beta-L-Arabinose                | C <sub>5</sub> H <sub>10</sub> O <sub>5</sub>                 | 150.13           | 0.9      | Carbohydrates    | "5328-37-0"   | 64260    | 28850   | 73110   | 57240    | 45720   | 76640   |
| 37   | Dihydroxyacetone phosphate      | C <sub>3</sub> H <sub>7</sub> O <sub>6</sub> P                | 170.058          | 0.9      | Carbohydrates    | "57-04-5"     | 199900   | 74810   | 34030   | 202500   | 116800  | 59530   |
| 38   | D-Galactose                     | C <sub>6</sub> H <sub>12</sub> O <sub>6</sub>                 | 180.16           | 0.9      | Carbohydrates    | "59-23-4"     | 1370000  | 2762000 | 723900  | 1812000  | 2506000 | 1150000 |
| 39   | Hydroxycitric acid              | C <sub>6</sub> H <sub>8</sub> O <sub>8</sub>                  | 208.124          | 0.9      | Organic Acids    | "6205-14-7"   | 76070    | 36780   | 14200   | 67890    | 31880   | 20540   |
| 40   | D-Xylonic acid                  | C <sub>5</sub> H <sub>10</sub> O <sub>6</sub>                 | 166.048          | 0.9      | Organic Acids    | "526-91-0"    | 3895000  | 4906000 | 491700  | 4288000  | 2499000 | 702300  |
| 41   | Riboflavin-5'-monophosphate     | C <sub>17</sub> H <sub>21</sub> NaO <sub>9</sub> P            | 456.344          | 0.91     | Polyphenol       | "146-17-8"    | 734900   | 21920   | 10840   | 1160000  | 17490   | 4023    |
| 42   | Lactobionic acid                | C <sub>12</sub> H <sub>22</sub> O <sub>12</sub>               | 358.3            | 0.91     | Carbohydrates    | "96-82-2"     | 77770    | 8433    | 19413   | 139300   | 8276    | 57311   |
| 43   | D-(-)-Cellobiose                | C <sub>12</sub> H <sub>22</sub> O <sub>11</sub>               | 342.3            | 0.91     | Carbohydrates    | "528-50-7"    | 63920    | 9040    | 7393    | 103400   | 53731   | 52582   |
| 44   | D-Fructose-1,6-biphosphate      | C <sub>6</sub> H <sub>14</sub> O <sub>12</sub> P <sub>2</sub> | 339.996          | 0.91     | Carbohydrates    | "38099-82-0"  | 110900   | 67600   | 20710   | 119600   | 25480   | 21670   |
| 45   | N-Acetylglucosamine 1-phosphate | C <sub>8</sub> H <sub>16</sub> NO <sub>9</sub> P              | 301.1            | 0.91     | Carbohydrates    | "6866-69-9"   | 58490    | 91910   | 58113   | 116900   | 125100  | 115799  |
| 46   | 6-Phosphogluconic acid          | C <sub>6</sub> H <sub>13</sub> O <sub>10</sub> P              | 276.135          | 0.91     | Carbohydrates    | "921-62-0"    | 405100   | 119300  | 41780   | 569400   | 97020   | 43040   |
| 47   | D-Gluconic acid                 | C <sub>6</sub> H <sub>12</sub> O <sub>7</sub>                 | 196.155          | 0.91     | Carbohydrates    | "526-95-4"    | 4663000  | 2059000 | 417900  | 6201000  | 2324000 | 450400  |
| 48   | Lactose                         | C <sub>12</sub> H <sub>22</sub> O <sub>11</sub>               | 342.3            | 0.911    | Carbohydrates    | "63-42-3"     | 169300   | 12550   | 5418    | 195600   | 12110   | 7614    |
| 49   | alpha-D-Glucose                 | C <sub>6</sub> H <sub>12</sub> O <sub>6</sub>                 | 180.16           | 0.912    | Carbohydrates    | "492-62-6"    | 1262000  | 774300  | 172900  | 1265000  | 810500  | 364100  |

|    |                                 |                                                                |         |                       |               |           |           |          |           |           |          |
|----|---------------------------------|----------------------------------------------------------------|---------|-----------------------|---------------|-----------|-----------|----------|-----------|-----------|----------|
| 50 | Fructose                        | C <sub>6</sub> H <sub>12</sub> O <sub>6</sub>                  | 180.16  | 0.92 Carbohydrates    | "57-48-7"     | 502600    | 146100    | 47360    | 768900    | 160600    | 81680    |
| 51 | D-Ribose                        | C <sub>5</sub> H <sub>10</sub> O <sub>5</sub>                  | 150.13  | 0.92 Carbohydrates    | "50-69-1"     | 421500    | 709700    | 250900   | 439800    | 645500    | 560700   |
| 52 | D-Galactonic acid               | C <sub>6</sub> H <sub>12</sub> O <sub>7</sub>                  | 196.155 | 0.92 Organic Acids    | "13382-27-9"  | 3066000   | 1395000   | 278500   | 3970000   | 1632000   | 299500   |
| 53 | L-Arabinitol                    | C <sub>5</sub> H <sub>12</sub> O <sub>5</sub>                  | 152.15  | 0.925 Carbohydrates   | "7643-75-6"   | 32090     | 7867      | 5975     | 52090     | 10280     | 18550    |
| 54 | Ribitol                         | C <sub>5</sub> H <sub>12</sub> O <sub>5</sub>                  | 152.15  | 0.927 Carbohydrates   | "488-81-3"    | 644800    | 128300    | 13840    | 805900    | 49310     | 29030    |
| 55 | Ajugol                          | C <sub>15</sub> H <sub>24</sub> O <sub>9</sub>                 | 348.346 | 0.93 Terpenoids       | "52949-83-4"  | 42750     | 14590     | 12990    | 21370     | 13360     | 24540    |
| 56 | Oxalic acid                     | C <sub>2</sub> H <sub>2</sub> O <sub>4</sub>                   | 90.035  | 0.93 Organic Acids    | "144-62-7"    | 2205000   | 215257    | 407900   | 2027000   | 397700    | 833900   |
| 57 | D-Glucose                       | C <sub>6</sub> H <sub>12</sub> O <sub>6</sub>                  | 180.156 | 0.94 Carbohydrates    | "50-99-7"     | 620500    | 1016000   | 218400   | 735700    | 915600    | 348800   |
| 58 | L-Gulono-1,4-lactone            | C <sub>6</sub> H <sub>10</sub> O <sub>6</sub>                  | 178.14  | 0.948 Carbohydrates   | "1128-23-0"   | 424400    | 153700    | 124500   | 463300    | 181500    | 133900   |
| 59 | Butein                          | C <sub>15</sub> H <sub>12</sub> O <sub>5</sub>                 | 272.069 | 0.95 Chalcones        | "487-52-5"    | 85820     | 49890     | 12749    | 225100    | 31420     | 8595     |
| 60 | Bisulfurous Acid                | C <sub>11</sub> H <sub>8</sub> O <sub>2</sub>                  | 172.18  | 0.95 Quinones         | "58-27-5"     | 308800    | 21410     | 16940    | 520700    | 45330     | 18030    |
| 61 | L-Fucose                        | C <sub>6</sub> H <sub>12</sub> O <sub>5</sub>                  | 164.069 | 0.95 Carbohydrates    | "2438-80-4"   | 213600    | 52200     | 52780    | 192200    | 64400     | 88090    |
| 62 | D-3-Phosphoglyceric acid        | C <sub>3</sub> H <sub>5</sub> H <sub>2</sub> O <sub>7</sub> P  | 230.021 | 0.95 Carbohydrates    | "80731-10-8"  | 1408000   | 169400    | 80250    | 2131000   | 254300    | 81640    |
| 63 | L-(+)-Rhamnose Monohydrate      | C <sub>6</sub> H <sub>14</sub> O <sub>6</sub>                  | 182.17  | 0.96 Carbohydrates    | "10030-85-0"  | 68060     | 16640     | 12390    | 97390     | 25730     | 56238    |
| 64 | Trehalose 6-phosphate           | C <sub>12</sub> H <sub>23</sub> O <sub>14</sub> P              | 422.276 | 0.96 Carbohydrates    | "4484-88-2"   | 172700    | 120100    | 52710    | 326000    | 121400    | 33040    |
| 65 | Melibiose                       | C <sub>12</sub> H <sub>22</sub> O <sub>11</sub>                | 342.3   | 0.96 Carbohydrates    | "585-99-9"    | 429500    | 203700    | 34180    | 665800    | 53030     | 47040    |
| 66 | D-Tagatose                      | C <sub>6</sub> H <sub>12</sub> O <sub>6</sub>                  | 180.156 | 0.96 Carbohydrates    | "87-81-0"     | 1928000   | 4475000   | 1148000  | 2414000   | 3915000   | 1934000  |
| 67 | alpha.alpha-Trehalose           | C <sub>12</sub> H <sub>22</sub> O <sub>11</sub>                | 342.296 | 0.962 Carbohydrates   | "99-20-7"     | 90490     | 77810     | 14400    | 192000    | 43795     | 6896     |
| 68 | Isomaltulose                    | C <sub>12</sub> H <sub>22</sub> O <sub>11</sub>                | 342.116 | 0.97 Carbohydrates    | "13718-94-0"  | 391000    | 244800    | 29180    | 800100    | 144396    | 43270    |
| 69 | Coniferin                       | C <sub>16</sub> H <sub>22</sub> O <sub>8</sub>                 | 342.132 | 0.97 Carbohydrates    | "531-29-3"    | 472800    | 255800    | 37430    | 1036000   | 86470     | 43040    |
| 70 | 3-Hydroxy-3-methyl butyric acid | C <sub>5</sub> H <sub>10</sub> O <sub>3</sub>                  | 118.063 | 0.97 Organic Acids    | "625-08-1"    | 25160     | 288200    | 242300   | 34320     | 273900    | 296600   |
| 71 | L-Rhamnose                      | C <sub>6</sub> H <sub>12</sub> O <sub>5</sub>                  | 164.16  | 0.98 Carbohydrates    | "73-34-7"     | 115000    | 46700     | 21180    | 131700    | 42630     | 40520    |
| 72 | Sucrose                         | C <sub>12</sub> H <sub>22</sub> O <sub>11</sub>                | 342.116 | 0.98 Carbohydrates    | "57-50-1"     | 106600    | 84630     | 14490    | 236700    | 29050     | 29650    |
| 73 | Capsianoside I                  | C <sub>32</sub> H <sub>52</sub> O <sub>14</sub>                | 660.336 | 0.98 Terpenoids       | "121924-04-7" | 907000    | 273700    | 252800   | 1290000   | 336200    | 265600   |
| 74 | Angelol B                       | C <sub>20</sub> H <sub>24</sub> O <sub>7</sub>                 | 376.4   | 0.98 Coumarins        | "83156-04-1"  | 27160     | 18880     | 7677     | 32960     | 11780     | 10040    |
| 75 | Madecassic acid                 | C <sub>6</sub> H <sub>12</sub> O <sub>5</sub>                  | 164.156 | 0.99 Terpenoids       | "18449-41-7"  | 23740     | 7635      | 7853     | 23780     | 12240     | 4783     |
| 76 | Glycolic acid                   | C <sub>2</sub> H <sub>4</sub> O <sub>3</sub>                   | 76.05   | 0.99 Organic Acids    | "79-14-1"     | 135900    | 291200    | 238500   | 154900    | 364000    | 461300   |
| 77 | Quinic acid                     | C <sub>7</sub> H <sub>12</sub> O <sub>6</sub>                  | 192.17  | 0.998 Polyphenol      | "77-95-2"     | 220100000 | 137600000 | 49360000 | 260200000 | 173300000 | 49220000 |
| 78 | beta-D-Lactose                  | C <sub>12</sub> H <sub>22</sub> O <sub>11</sub>                | 342.297 | 1 Carbohydrates       | "5965-66-2"   | 139900    | 25810     | 17490    | 241100    | 43108     | 10470    |
| 79 | Tartaric acid                   | C <sub>4</sub> H <sub>6</sub> O <sub>6</sub>                   | 150.09  | 1.008 Organic Acids   | "87-69-4"     | 957100    | 394900    | 193800   | 1048000   | 768800    | 750000   |
| 80 | Raffinose                       | C <sub>18</sub> H <sub>32</sub> O <sub>16</sub>                | 504.437 | 1.009 Carbohydrates   | "512-69-6"    | 28420     | 21160     | 7713     | 66070     | 10130     | 33363    |
| 81 | Sakuranetin                     | C <sub>16</sub> H <sub>14</sub> O <sub>5</sub>                 | 286.279 | 1.01 Flavanones       | "2957-21-3"   | 115300    | 52300     | 13200    | 157400    | 46080     | 9793     |
| 82 | Maltose                         | C <sub>12</sub> H <sub>22</sub> O <sub>11</sub>                | 342.3   | 1.01 Carbohydrates    | "69-79-4"     | 82010     | 12980     | 7975     | 169600    | 52395     | 5470     |
| 83 | D-Xylulose                      | C <sub>5</sub> H <sub>10</sub> O <sub>5</sub>                  | 150.13  | 1.01 Carbohydrates    | "551-84-8"    | 25000     | 26710     | 16640    | 30530     | 25670     | 23700    |
| 84 | D-Xylose                        | C <sub>5</sub> H <sub>10</sub> O <sub>5</sub>                  | 150.131 | 1.01 Carbohydrates    | "58-86-6"     | 117900    | 267700    | 86020    | 126700    | 229200    | 169700   |
| 85 | Cellotriose                     | C <sub>18</sub> H <sub>32</sub> O <sub>16</sub>                | 504.437 | 1.02 Carbohydrates    | "33404-34-1"  | 11200     | 26950     | 7694     | 12540     | 8367      | 5880     |
| 86 | Gluconolactone                  | C <sub>6</sub> H <sub>10</sub> O <sub>6</sub>                  | 178.14  | 1.02 Carbohydrates    | "90-80-2"     | 202600    | 96040     | 65400    | 289500    | 104100    | 83910    |
| 87 | Kinetin 9-riboside              | C <sub>15</sub> H <sub>17</sub> N <sub>5</sub> O <sub>5</sub>  | 347.326 | 1.03 Anthocyanins     | "4338-47-0"   | 9230      | 10450     | 242200   | 15090     | 18080     | 201500   |
| 88 | Glyceraldehyde 3-phosphate      | C <sub>3</sub> H <sub>7</sub> O <sub>6</sub> P                 | 170.058 | 1.03 Carbohydrates    | "142-10-9"    | 6735      | 43130     | 33170    | 6016      | 187200    | 59500    |
| 89 | Guanidinoethyl Sulfonate        | C <sub>7</sub> H <sub>9</sub> N <sub>3</sub> O <sub>3</sub> S  | 167.187 | 1.03 Organic Acids    | "543-18-0"    | 12230     | 12401     | 7374     | 20150     | 10869     | 13360    |
| 90 | Shikimic Acid                   | C <sub>7</sub> H <sub>10</sub> O <sub>5</sub>                  | 174.15  | 1.038 Polyphenol      | "138-59-0"    | 33840000  | 33690000  | 5797000  | 36240000  | 33750000  | 4238000  |
| 91 | P-Coumaryl Alcohol              | C <sub>9</sub> H <sub>10</sub> O <sub>2</sub>                  | 150.174 | 1.04 Phenylpropanoids | "3690-05-9"   | 88670     | 338300    | 163300   | 114400    | 261900    | 255100   |
| 92 | D-Erythrose 4-phosphate         | C <sub>4</sub> H <sub>9</sub> O <sub>7</sub> P                 | 200.084 | 1.08 Carbohydrates    | "585-18-2"    | 151500    | 68510     | 63640    | 249000    | 199300    | 59190    |
| 93 | L(-)-Malic acid                 | C <sub>4</sub> H <sub>6</sub> O <sub>5</sub>                   | 134.022 | 1.08 Organic Acids    | "636-61-3"    | 103700000 | 68820000  | 40290000 | 117000000 | 151900000 | 95580000 |
| 94 | Sucralose                       | C <sub>12</sub> H <sub>19</sub> Cl <sub>3</sub> O <sub>8</sub> | 397.634 | 1.1 Carbohydrates     | "56038-13-2"  | 21100     | 8414      | 9628     | 12830     | 6135      | 11400    |
| 95 | Fumaric Acid                    | C <sub>4</sub> H <sub>4</sub> O <sub>4</sub>                   | 116.072 | 1.11 Organic Acids    | "110-17-8"    | 3431000   | 2424000   | 1388000  | 4067000   | 4966000   | 3548000  |
| 96 | 8-Gingerol                      | C <sub>15</sub> H <sub>32</sub> O <sub>20</sub>                | 868.702 | 1.13 Polyphenol       | "30462-35-2"  | 39740     | 27100     | 19560    | 36930     | 50960     | 29840    |
| 97 | 3-Hydroxybutyrate               | C <sub>4</sub> H <sub>8</sub> O <sub>3</sub>                   | 104.104 | 1.13 Organic Acids    | "300-85-6"    | 2210000   | 2081000   | 1501000  | 2770000   | 5432000   | 5210000  |
| 98 | Malonic acid                    | C <sub>3</sub> H <sub>4</sub> O <sub>4</sub>                   | 104.011 | 1.19 Organic Acids    | "141-82-2"    | 4126000   | 4031000   | 3003000  | 5194000   | 10200000  | 10200000 |

|     |                                     |                                                 |         |                       |               |           |           |           |           |            |            |
|-----|-------------------------------------|-------------------------------------------------|---------|-----------------------|---------------|-----------|-----------|-----------|-----------|------------|------------|
| 99  | 3-Hydroxypropanoic acid             | C <sub>3</sub> H <sub>6</sub> O <sub>3</sub>    | 90.032  | 1.21 Organic Acids    | "503-66-2"    | 165000    | 327900    | 414500    | 188700    | 462800     | 983300     |
| 100 | Chrysin                             | C <sub>15</sub> H <sub>10</sub> O <sub>4</sub>  | 254.24  | 1.284 Flavones        | "480-40-0"    | 80210     | 7014      | 19336     | 137200    | 5815       | 56441      |
| 101 | D-threo-Isocitric acid              | C <sub>6</sub> H <sub>8</sub> O <sub>7</sub>    | 192.124 | 1.41 Organic Acids    | "6061-97-8"   | 41770000  | 17660000  | 11620000  | 38000000  | 53710000   | 35790000   |
| 102 | D-Lactic acid                       | C <sub>3</sub> H <sub>5</sub> O <sub>3</sub>    | 90.08   | 1.44 Organic Acids    | "10326-41-7"  | 84380     | 1855000   | 658000    | 52030     | 2804000    | 1029000    |
| 103 | L-Citramalic acid                   | C <sub>5</sub> H <sub>8</sub> O <sub>5</sub>    | 148.037 | 1.46 Organic Acids    | "6236-09-5"   | 1865000   | 661400    | 492900    | 2193000   | 1520000    | 1259000    |
| 104 | Carvacrol                           | C <sub>10</sub> H <sub>14</sub> O               | 150.22  | 1.467 Terpenoids      | "499-75-2"    | 8944      | 20280     | 46200     | 32565     | 20120      | 23970      |
| 105 | D-Arabinono-1,4-lactone             | C <sub>5</sub> H <sub>8</sub> O <sub>5</sub>    | 148.037 | 1.48 Carbohydrates    | "2782-09-4"   | 1323000   | 1201000   | 357400    | 1933000   | 1722000    | 1066000    |
| 106 | Lactic acid                         | C <sub>3</sub> H <sub>6</sub> O <sub>3</sub>    | 90.078  | 1.48 Organic Acids    | "50-21-5"     | 1216000   | 25550000  | 9295000   | 711900    | 39610000   | 14730000   |
| 107 | L-Lactic acid                       | C <sub>3</sub> H <sub>6</sub> O <sub>3</sub>    | 90.08   | 1.487 Organic Acids   | "79-33-4"     | 63670     | 1322000   | 427200    | 36370     | 2170000    | 739600     |
| 108 | 2-furanoic acid                     | C <sub>5</sub> H <sub>4</sub> O <sub>3</sub>    | 112.084 | 1.49 Organic Acids    | "88-14-2"     | 13310000  | 5873000   | 3772000   | 15000000  | 12800000   | 10910000   |
| 109 | Isocitrate                          | C <sub>6</sub> H <sub>8</sub> O <sub>7</sub>    | 192.124 | 1.49 Organic Acids    | "320-77-4"    | 162000000 | 68910000  | 48470000  | 198600000 | 164400000  | 134100000  |
| 110 | Citric acid                         | C <sub>6</sub> H <sub>8</sub> O <sub>7</sub>    | 192.12  | 1.516 Organic Acids   | "77-92-9"     | 119400000 | 53440000  | 34320000  | 143300000 | 122200000  | 88850000   |
| 111 | D-Galacturonic acid                 | C <sub>6</sub> H <sub>10</sub> O <sub>7</sub>   | 194.139 | 1.56 Carbohydrates    | "685-73-4"    | 3336000   | 1470000   | 1175000   | 3752000   | 3259000    | 2836000    |
| 112 | cis-Aconitic acid                   | C <sub>6</sub> H <sub>6</sub> O <sub>6</sub>    | 174.11  | 1.766 Organic Acids   | "585-84-2"    | 687400    | 3088000   | 225400    | 961800    | 2396000    | 3519000    |
| 113 | Acetoxycetic acid                   | C <sub>4</sub> H <sub>6</sub> O <sub>4</sub>    | 118.027 | 1.89 Organic Acids    | "13831-30-6"  | 7994      | 9545      | 6081      | 6769      | 28980      | 23360      |
| 114 | Succinic acid                       | C <sub>4</sub> H <sub>6</sub> O <sub>4</sub>    | 118.09  | 1.936 Organic Acids   | "110-15-6"    | 25550000  | 23860000  | 28640000  | 28360000  | 54380000   | 73860000   |
| 115 | Methylmalonate                      | C <sub>4</sub> H <sub>6</sub> O <sub>4</sub>    | 118.09  | 1.938 Organic Acids   | "516-05-2"    | 9117000   | 8341000   | 9609000   | 10960000  | 21520000   | 28760000   |
| 116 | Citramalate                         | C <sub>6</sub> H <sub>8</sub> O <sub>5</sub>    | 148     | 2.04 Organic Acids    | "2306-22-1"   | 390300    | 481100    | 369000    | 508700    | 1395000    | 1534000    |
| 117 | Monotropein                         | C <sub>16</sub> H <sub>22</sub> O <sub>11</sub> | 390.34  | 2.2 Terpenoids        | "5945-50-6"   | 8552      | 4357      | 4059      | 15650     | 15600      | 29320      |
| 118 | cis-4-Hydroxy-D-proline             | C <sub>5</sub> H <sub>9</sub> NO <sub>3</sub>   | 131.13  | 2.26 Organic Acids    | "2584-71-6"   | 102500    | 59190     | 6516      | 153300    | 64560      | 8547       |
| 119 | 1,6-Anhydro-beta-D-Glucopyranose    | C <sub>6</sub> H <sub>10</sub> O <sub>5</sub>   | 162.141 | 2.3 Carbohydrates     | "498-07-7"    | 702200    | 598300    | 627600    | 874600    | 1935000    | 2286000    |
| 120 | Arbutin                             | C <sub>12</sub> H <sub>16</sub> O <sub>7</sub>  | 272.25  | 2.32 Carbohydrates    | "497-76-7"    | 108800    | 277500    | 456300    | 114200    | 428000     | 951500     |
| 121 | alpha-Arbutin                       | C <sub>12</sub> H <sub>16</sub> O <sub>7</sub>  | 272.25  | 2.33 Carbohydrates    | "84380-01-8"  | 355900    | 988300    | 1719000   | 385900    | 1557000    | 3631000    |
| 122 | beta-Hydroxyisobutyrate             | C <sub>4</sub> H <sub>8</sub> O <sub>3</sub>    | 104.104 | 2.4 Organic Acids     | "2068-83-9"   | 35890     | 112600    | 52690     | 34510     | 182100     | 122000     |
| 123 | DI-3,4-Dihydroxymandelic acid       | C <sub>8</sub> H <sub>8</sub> O <sub>5</sub>    | 184.037 | 2.41 Polyphenol       | "775-01-9"    | 293800    | 488700    | 475700    | 328100    | 933900     | 1122000    |
| 124 | 10-Deacetylasperulosidic acid       | C <sub>16</sub> H <sub>22</sub> O <sub>11</sub> | 390.344 | 2.56 Terpenoids       | "14259-55-3"  | 26290     | 21420     | 26040     | 27870     | 51780      | 75150      |
| 125 | 2-Methylsuccinic acid               | C <sub>4</sub> H <sub>8</sub> O <sub>3</sub>    | 104.1   | 2.597 Organic Acids   | "594-61-6"    | 125800    | 235500    | 208300    | 158100    | 534200     | 522000     |
| 126 | Laricitrin                          | C <sub>16</sub> H <sub>12</sub> O <sub>8</sub>  | 332.262 | 2.6 Flavonols         | "53472-37-0"  | 3083000   | 134200    | 116500    | 2736000   | 775800     | 39970      |
| 127 | trans-2,3,4-Trimethoxycinnamic Acid | C <sub>12</sub> H <sub>14</sub> O <sub>5</sub>  | 238.237 | 2.65 Phenylpropanoids | "33130-03-9"  | 50717     | 16380     | 27180     | 50126     | 35010      | 67970      |
| 128 | 2-Hydroxybutyric acid               | C <sub>4</sub> H <sub>8</sub> O <sub>3</sub>    | 104.1   | 2.741 Organic Acids   | "600-15-7"    | 125900    | 1184000   | 874600    | 149300    | 1959000    | 633200     |
| 129 | DI-Glyceraldehyde 3-phosphate       | C <sub>3</sub> H <sub>7</sub> O <sub>6</sub> P  | 169.998 | 2.76 Carbohydrates    | "591-59-3"    | 50500000  | 279800000 | 347200000 | 57480000  | 406300000  | 553600000  |
| 130 | Pyrogallol                          | C <sub>6</sub> H <sub>6</sub> O <sub>3</sub>    | 126.11  | 2.777 Polyphenol      | "87-66-1"     | 18990000  | 117700000 | 138300000 | 22290000  | 158300000  | 233000000  |
| 131 | Gallic acid                         | C <sub>7</sub> H <sub>6</sub> O <sub>5</sub>    | 170.12  | 2.78 Polyphenol       | "149-91-7"    | 154000000 | 772900000 | 900100000 | 178000000 | 1020000000 | 1291000000 |
| 132 | Levulinic acid                      | C <sub>5</sub> H <sub>8</sub> O <sub>3</sub>    | 116.12  | 3.489 Organic Acids   | "123-76-2"    | 71270     | 33110     | 75250     | 129300    | 80310      | 242500     |
| 133 | Guaiacol                            | C <sub>7</sub> H <sub>8</sub> O <sub>2</sub>    | 124.137 | 3.62 Polyphenol       | "90-05-1"     | 752800    | 367500    | 1851000   | 1008000   | 876000     | 10530000   |
| 134 | Kinsenoside                         | C <sub>10</sub> H <sub>16</sub> O <sub>8</sub>  | 264.229 | 3.93 Carbohydrates    | "151870-74-5" | 19770     | 6279      | 12942     | 24210     | 9414       | 23099      |
| 135 | Homogentisic Acid                   | C <sub>8</sub> H <sub>8</sub> O <sub>4</sub>    | 168.15  | 4.059 Organic Acids   | "451-13-8"    | 76370     | 217126    | 271025    | 133000    | 240600     | 422300     |
| 136 | Diethyl phosphate                   | C <sub>4</sub> H <sub>11</sub> O <sub>4</sub> P | 154     | 4.2 Organic Acids     | "598-02-7"    | 5615      | 16850     | 39330     | 3561      | 17880      | 180800     |
| 137 | Androsin                            | C <sub>15</sub> H <sub>20</sub> O <sub>8</sub>  | 328.319 | 4.3 Polyphenol        | "531-28-2"    | 96190     | 236100    | 36920     | 96560     | 72120      | 55730      |
| 138 | 3,5-Dihydroxybenzoic acid           | C <sub>7</sub> H <sub>6</sub> O <sub>4</sub>    | 154.12  | 4.461 Benzoic acids   | "99-10-5"     | 122100000 | 26400000  | 76960000  | 133900000 | 42100000   | 144000000  |
| 139 | Danshensu                           | C <sub>9</sub> H <sub>10</sub> O <sub>5</sub>   | 198.17  | 4.473 Polyphenol      | "76822-21-4"  | 16240     | 2552000   | 9447000   | 23120     | 7127000    | 17250000   |
| 140 | (-)-Galocatechin                    | C <sub>15</sub> H <sub>14</sub> O <sub>7</sub>  | 306.267 | 4.51 Flavonoids       | "3371-27-5"   | 32140     | 3639      | 36260     | 37520     | 57360      | 160800     |
| 141 | Catalpol                            | C <sub>15</sub> H <sub>22</sub> O <sub>10</sub> | 362.333 | 4.55 Terpenoids       | "2415-24-9"   | 216300    | 72770     | 313500    | 195200    | 234783     | 498100     |
| 142 | 1-O-Gentisoyl-D-glucoside           | C <sub>13</sub> H <sub>16</sub> O <sub>9</sub>  | 316.079 | 4.56 Polyphenol       | "23445-11-6"  | 1601000   | 1668000   | 1415000   | 1823000   | 2783000    | 2483000    |
| 143 | 3-Aminosalicylic Acid               | C <sub>7</sub> H <sub>7</sub> NO <sub>3</sub>   | 153.135 | 4.57 Organic Acids    | "570-23-0"    | 227700    | 483100    | 241700    | 238400    | 266500     | 571600     |
| 144 | Protocatechuic acid                 | C <sub>7</sub> H <sub>6</sub> O <sub>4</sub>    | 154.12  | 4.571 Polyphenol      | "99-50-3"     | 221400000 | 50380000  | 134800000 | 242100000 | 74730000   | 245300000  |
| 145 | Geniposidic acid                    | C <sub>16</sub> H <sub>22</sub> O <sub>10</sub> | 374.34  | 4.615 Terpenoids      | "27741-01-1"  | 111500    | 31580     | 18060     | 76235     | 24080      | 65270      |
| 146 | 2,4-Dihydroxybenzoic acid           | C <sub>7</sub> H <sub>6</sub> O <sub>4</sub>    | 154.12  | 4.623 Organic Acids   | "89-86-1"     | 18080000  | 3615000   | 10430000  | 20810000  | 5692000    | 21620000   |
| 147 | 1-O-Galloyl-D-glucose               | C <sub>13</sub> H <sub>16</sub> O <sub>10</sub> | 332.074 | 4.68 Polyphenol       | "58511-73-2"  | 50290     | 620000    | 145700    | 154553    | 428200     | 421744     |

|     |                                  |                                                    |          |                        |               |          |          |          |          |           |          |
|-----|----------------------------------|----------------------------------------------------|----------|------------------------|---------------|----------|----------|----------|----------|-----------|----------|
| 148 | Koaburaside                      | C <sub>14</sub> H <sub>20</sub> O <sub>9</sub>     | 332.111  | 4.68 Polyphenol        | "41653-73-0"  | 22750    | 1263000  | 227100   | 24510    | 614000    | 257000   |
| 149 | Methyl salicylate-2-O-glucoside  | C <sub>14</sub> H <sub>18</sub> O <sub>8</sub>     | 314.1    | 4.8 Polyphenol         | "10019-60-0"  | 193645   | 42930    | 237100   | 278655   | 68870     | 508500   |
| 150 | 3-Hydroxy-glabrol                | C <sub>25</sub> H <sub>28</sub> O <sub>5</sub>     | 40.499   | 4.82 Flavonoids        | "74148-41-7"  | 110458   | 37780    | 12830    | 133062   | 96090     | 99310    |
| 151 | Neochlorogenic acid              | C <sub>16</sub> H <sub>18</sub> O <sub>9</sub>     | 354.309  | 4.879 Polyphenol       | "906-33-2"    | 20620    | 9170     | 12763    | 28810    | 15396     | 30100    |
| 152 | Mandelic acid                    | C <sub>8</sub> H <sub>8</sub> O <sub>3</sub>       | 152.047  | 4.91 Organic Acids     | "17199-29-0"  | 340100   | 542800   | 255700   | 371000   | 489400    | 503500   |
| 153 | 2-Methylpentanedioic acid        | C <sub>6</sub> H <sub>10</sub> O <sub>4</sub>      | 146.14   | 5.012 Organic Acids    | "617-62-9"    | 49100    | 227700   | 208700   | 51860    | 367900    | 563700   |
| 154 | Esculin                          | C <sub>15</sub> H <sub>16</sub> O <sub>9</sub>     | 340.28   | 5.145 Coumarins        | "531-75-9"    | 145700   | 55880    | 27060    | 181100   | 90770     | 66160    |
| 155 | Procyanidin B3                   | C <sub>30</sub> H <sub>26</sub> O <sub>12</sub>    | 578.142  | 5.15 Anthocyanins      | "23567-23-9"  | 580451   | 130400   | 235800   | 977694   | 1051000   | 48550    |
| 156 | Procyanidin B2                   | C <sub>30</sub> H <sub>26</sub> O <sub>12</sub>    | 578.529  | 5.16 Anthocyanins      | "29106-49-8"  | 600913   | 180200   | 303700   | 955008   | 1117000   | 81750    |
| 157 | Bergenin                         | C <sub>14</sub> H <sub>16</sub> O <sub>9</sub>     | 328.27   | 5.196 Phenylpropanoids | "477-90-7"    | 11366    | 12590    | 9945     | 14468    | 11987     | 17290    |
| 158 | Cyanidin 3-O-glucoside           | C <sub>21</sub> H <sub>21</sub> ClO <sub>11</sub>  | 484.84   | 5.21 Anthocyanins      | "7084-24-4"   | 606000   | 488000   | 243100   | 760200   | 810400    | 425300   |
| 159 | Idaein chloride                  | C <sub>21</sub> H <sub>21</sub> ClO <sub>11</sub>  | 484.84   | 5.213 Anthocyanins     | "27661-36-5"  | 74562    | 49080    | 35173    | 80016    | 113800    | 62300    |
| 160 | Petunidin-3-O-glucoside chloride | C <sub>22</sub> H <sub>23</sub> O <sub>12</sub> Cl | 514.865  | 5.282 Anthocyanins     | "6988-81-4"   | 8488     | 3741     | 22380    | 5056     | 41830     | 43090    |
| 161 | 4-Hydroxy-3-methoxycinnamic acid | C <sub>10</sub> H <sub>10</sub> O <sub>4</sub>     | 194.0579 | 5.34 Phenylpropanoids  | "537-98-4"    | 97690    | 112500   | 85170    | 110156   | 151800    | 176500   |
| 162 | Sieboldin                        | C <sub>21</sub> H <sub>24</sub> O <sub>11</sub>    | 452.131  | 5.35 Flavonoids        | "18777-73-6"  | 39830    | 25780    | 26203    | 32160    | 49285     | 64230    |
| 163 | (+)-Catechin                     | C <sub>15</sub> H <sub>14</sub> O <sub>6</sub>     | 290.27   | 5.37 flavanol          | "154-23-4"    | 121526   | 27690    | 15300    | 150911   | 129700    | 45681    |
| 164 | Ophiopogonanone C                | C <sub>19</sub> H <sub>16</sub> O <sub>7</sub>     | 356.332  | 5.38 Flavonoids        | "477336-75-7" | 11940    | 104400   | 66230    | 15840    | 146800    | 106300   |
| 165 | 2,5-Dihydroxybenzoic acid        | C <sub>7</sub> H <sub>6</sub> O <sub>4</sub>       | 154.12   | 5.44 Benzoic acids     | "490-79-9"    | 3205000  | 137800   | 1818000  | 4340000  | 510700    | 5509000  |
| 166 | Cryptochlorogenic acid           | C <sub>16</sub> H <sub>18</sub> O <sub>9</sub>     | 354.309  | 5.443 Polyphenol       | "905-99-7"    | 197700   | 34281    | 32272    | 199900   | 66498     | 67180    |
| 167 | 1-Caffeoylquinic acid            | C <sub>16</sub> H <sub>18</sub> O <sub>9</sub>     | 354.095  | 5.46 Polyphenol        | "1241-87-8"   | 3669000  | 508200   | 183900   | 3598000  | 532300    | 5893000  |
| 168 | 2-(Formylamino)benzoic acid      | C <sub>8</sub> H <sub>7</sub> NO <sub>3</sub>      | 165.043  | 5.47 Benzoic acids     | "3342-77-6"   | 26900    | 18925    | 10977    | 29620    | 28311     | 28640    |
| 169 | (2S)-2-Isopropylmalate           | C <sub>7</sub> H <sub>12</sub> O <sub>5</sub>      | 176.068  | 5.52 Organic Acids     | "49601-06-1"  | 459000   | 37920    | 190100   | 514300   | 134500    | 656100   |
| 170 | Methyl gallate                   | C <sub>8</sub> H <sub>8</sub> O <sub>5</sub>       | 100.12   | 5.523 Benzoic acids    | "99-24-1"     | 14270000 | 35370000 | 16070000 | 14860000 | 100900000 | 45860000 |
| 171 | 3-O-Feruloylquinic acid          | C <sub>17</sub> H <sub>20</sub> O <sub>9</sub>     | 368.335  | 5.55 Polyphenol        | "1899-29-2"   | 22790    | 48080    | 32051    | 46050    | 157900    | 20170    |
| 172 | Warfarin Sodium                  | C <sub>19</sub> H <sub>15</sub> O <sub>4</sub>     | 330.31   | 5.56 Coumarins         | "129-06-6"    | 74710    | 70070    | 27810    | 128500   | 75880     | 136500   |
| 173 | Swertiamarin                     | C <sub>16</sub> H <sub>22</sub> O <sub>10</sub>    | 374.34   | 5.578 Terpenoids       | "17388-39-5"  | 8409     | 71370    | 37100    | 39672    | 239500    | 31470    |
| 174 | (R)-Mandelic acid                | C <sub>8</sub> H <sub>8</sub> O <sub>3</sub>       | 152.147  | 5.661 Organic Acids    | "611-71-2"    | 584968   | 121100   | 304900   | 907743   | 184400    | 1443000  |
| 175 | Corilagin                        | C <sub>27</sub> H <sub>22</sub> O <sub>18</sub>    | 634.453  | 5.7 Polyphenol         | "23094-69-1"  | 17540000 | 2033380  | 1526000  | 21610000 | 4881000   | 4721000  |
| 176 | Dihydrokaempferol                | C <sub>15</sub> H <sub>12</sub> O <sub>6</sub>     | 288.063  | 5.75 Flavonoids        | "480-20-6"    | 243100   | 66520    | 81073    | 298400   | 155500    | 162900   |
| 177 | Acetylharpagide                  | C <sub>17</sub> H <sub>26</sub> O <sub>11</sub>    | 406.38   | 5.783 Terpenoids       | "6926-14-3"   | 20410    | 44220    | 23870    | 3610     | 273100    | 51530    |
| 178 | Caffeic acid                     | C <sub>9</sub> H <sub>8</sub> O <sub>4</sub>       | 180.16   | 5.801 Phenylpropanoids | "331-39-5"    | 169400   | 5120000  | 21750000 | 113300   | 7394000   | 31140000 |
| 179 | Terephthalic acid                | C <sub>8</sub> H <sub>6</sub> O <sub>4</sub>       | 166.13   | 5.801 Benzoic acids    | "100-21-0"    | 484000   | 32790000 | 28560000 | 401400   | 37720000  | 49120000 |
| 180 | Esculetin                        | C <sub>9</sub> H <sub>8</sub> O <sub>4</sub>       | 178.14   | 5.832 Coumarins        | "305-01-1"    | 12210    | 13540    | 16470    | 18280    | 6959      | 20640    |
| 181 | Protosappanin B                  | C <sub>16</sub> H <sub>16</sub> O <sub>6</sub>     | 304.295  | 5.86 Polyphenol        | "102036-29-3" | 137130   | 250300   | 219800   | 55070    | 251500    | 440600   |
| 182 | Epigallocatechin 3-gallate       | C <sub>22</sub> H <sub>18</sub> O <sub>11</sub>    | 458.37   | 5.874 Polyphenol       | "989-51-5"    | 41950    | 54096    | 20110    | 125800   | 190400    | 62160    |
| 183 | 1-O-b-D-glucopyranosyl sinapate  | C <sub>17</sub> H <sub>22</sub> O <sub>10</sub>    | 386.351  | 5.88 Polyphenol        | "78185-48-5"  | 92770    | 163600   | 39630    | 118300   | 176900    | 134700   |
| 184 | (-)-Epicatechin                  | C <sub>15</sub> H <sub>14</sub> O <sub>6</sub>     | 290.27   | 5.9 flavanol           | "490-46-0"    | 1961000  | 1470000  | 1270000  | 2204000  | 2788000   | 1384000  |
| 185 | Vanillie acid                    | C <sub>8</sub> H <sub>8</sub> O <sub>4</sub>       | 168.15   | 5.901 Organic Acids    | "121-34-6"    | 674000   | 424300   | 1839000  | 764700   | 792200    | 4385000  |
| 186 | 3-O-p-Coumaroylquinic acid       | C <sub>16</sub> H <sub>18</sub> O <sub>8</sub>     | 338.1    | 5.92 Polyphenol        | "87099-71-6"  | 32500000 | 278100   | 764400   | 28720000 | 720300    | 279500   |
| 187 | 4-O-p-Coumaroylquinic acid       | C <sub>16</sub> H <sub>18</sub> O <sub>8</sub>     | 338.1    | 5.93 Polyphenol        | "32451-86-8"  | 4349000  | 36360    | 105400   | 4908000  | 88630     | 33040    |
| 188 | L-3-Phenyllactic Acid            | C <sub>9</sub> H <sub>10</sub> O <sub>3</sub>      | 166.174  | 6.03 Phenylpropanoids  | "20312-36-1"  | 41160    | 128700   | 78648    | 53940    | 193200    | 134803   |
| 189 | Isoschaftoside                   | C <sub>26</sub> H <sub>28</sub> O <sub>14</sub>    | 564.499  | 6.03 Flavones          | "52012-29-0"  | 925000   | 705300   | 211900   | 1070000  | 798200    | 261300   |
| 190 | Homovanillic acid                | C <sub>9</sub> H <sub>10</sub> O <sub>4</sub>      | 182.17   | 6.091 Organic Acids    | "306-08-1"    | 35350    | 217205   | 453800   | 88750    | 241600    | 809900   |
| 191 | Isovanillic acid                 | C <sub>8</sub> H <sub>8</sub> O <sub>4</sub>       | 168.15   | 6.1 Benzoic acids      | "645-08-9"    | 1197000  | 977200   | 3896000  | 1548000  | 1613000   | 10220000 |
| 192 | 2,6-Dihydroxybenzoic acid        | C <sub>7</sub> H <sub>6</sub> O <sub>4</sub>       | 154.12   | 6.13 Benzoic acids     | "303-07-1"    | 1163000  | 685000   | 4824000  | 1460000  | 1212000   | 5984000  |
| 193 | Quercetin 3-O-sophoroside        | C <sub>27</sub> H <sub>30</sub> O <sub>17</sub>    | 626.524  | 6.13 Alkaloids         | "18609-17-1"  | 128800   | 364400   | 152800   | 144400   | 339900    | 266500   |
| 194 | 2-Isopropylmalic acid            | C <sub>7</sub> H <sub>12</sub> O <sub>5</sub>      | 176.167  | 6.13 Organic Acids     | "3237-44-3"   | 13721    | 11265    | 12490    | 15500    | 4420      | 12060    |
| 195 | Isoorientin                      | C <sub>21</sub> H <sub>20</sub> O <sub>11</sub>    | 448.38   | 6.174 Flavones         | "4261-42-1"   | 161400   | 45300    | 25097    | 174600   | 309200    | 23660    |
| 196 | 2,3-Dihydroxybenzoic acid        | C <sub>7</sub> H <sub>6</sub> O <sub>4</sub>       | 154.027  | 6.21 Benzoic acids     | "303-38-8"    | 281600   | 238600   | 1657000  | 472300   | 418300    | 2416000  |

|     |                                               |                                                                    |          |                        |               |          |          |           |          |          |           |
|-----|-----------------------------------------------|--------------------------------------------------------------------|----------|------------------------|---------------|----------|----------|-----------|----------|----------|-----------|
| 197 | Secoisolariciresinol diglucoside              | C <sub>32</sub> H <sub>46</sub> O <sub>16</sub>                    | 686.7    | 6.224 Lignans          | "148244-82-0" | 15080    | 21640    | 8973      | 9563     | 14330    | 7775      |
| 198 | E-3,4,5'-Trihydroxy-3'-glucopyranosylstilbene | C <sub>20</sub> H <sub>22</sub> O <sub>9</sub>                     | 406.4    | 6.23 Phenylpropanoids  | "29884-49-9"  | 62280    | 59440    | 54610     | 63983    | 84660    | 85360     |
| 199 | Glucosylvitexin                               | C <sub>27</sub> H <sub>30</sub> O <sub>15</sub>                    | 594.526  | 6.25 Flavonoids        | "76135-82-5"  | 4127000  | 4753000  | 1320000   | 4417000  | 5085000  | 1668000   |
| 200 | Cyanidin chloride                             | C <sub>15</sub> H <sub>11</sub> ClO <sub>6</sub>                   | 322.7    | 6.263 Anthocyanins     | "528-58-5"    | 57610    | 9719     | 29910     | 90890    | 107200   | 95613     |
| 201 | Saponarin                                     | C <sub>27</sub> H <sub>30</sub> O <sub>15</sub>                    | 594.518  | 6.27 Flavonoids        | "20310-89-8"  | 535700   | 589500   | 109700    | 613600   | 734900   | 170600    |
| 202 | Plantamajoside                                | C <sub>29</sub> H <sub>36</sub> O <sub>16</sub>                    | 640.587  | 6.35 Phenylpropanoids  | "104777-68-6" | 18810    | 6822     | 3462      | 17600    | 14310    | 20633     |
| 203 | Rutin hydrate                                 | C <sub>27</sub> H <sub>30</sub> O <sub>16</sub> .xH <sub>2</sub> O | 610.52   | 6.36 Flavonoids        | "207671-50-9" | 16790000 | 34600000 | 26830000  | 16620000 | 69000000 | 35740000  |
| 204 | Isohemiphloin                                 | C <sub>21</sub> H <sub>22</sub> O <sub>10</sub>                    | 434.121  | 6.39 Flavonones        | "3682-02-8"   | 241200   | 95860    | 207900    | 234900   | 89990    | 119100    |
| 205 | 2-Hydroxyisocaproic Acid                      | C <sub>6</sub> H <sub>12</sub> O <sub>3</sub>                      | 132.158  | 6.39 Organic Acids     | "498-36-2"    | 15150    | 31560    | 81490     | 14040    | 62150    | 215800    |
| 206 | Vitexin-2-O-rhamnoside                        | C <sub>27</sub> H <sub>30</sub> O <sub>14</sub>                    | 578.52   | 6.411 Flavonoids       | "64820-99-1"  | 292200   | 345200   | 103500    | 302700   | 526900   | 157500    |
| 207 | Spinosin                                      | C <sub>28</sub> H <sub>32</sub> O <sub>15</sub>                    | 608.545  | 6.418 Flavones         | "72063-39-9"  | 142462   | 249100   | 123940    | 168375   | 261300   | 190439    |
| 208 | Neohesperidin dihydrochalcone                 | C <sub>28</sub> H <sub>36</sub> O <sub>15</sub>                    | 612.576  | 6.43 Flavanones        | "20702-77-6"  | 235300   | 513400   | 311300    | 222900   | 877800   | 467700    |
| 209 | 2-Hydroxycinnamate                            | C <sub>9</sub> H <sub>8</sub> O <sub>3</sub>                       | 164.047  | 6.48 Phenylpropanoids  | "583-17-5"    | 2496000  | 32180000 | 250300000 | 2403000  | 47890000 | 326700000 |
| 210 | Rutin                                         | C <sub>27</sub> H <sub>30</sub> O <sub>16</sub>                    | 610.518  | 6.51 Flavones          | "153-18-4"    | 42610000 | 29430000 | 68460000  | 37000000 | 58040000 | 130600000 |
| 211 | (-)-Catechin Gallate                          | C <sub>22</sub> H <sub>18</sub> O <sub>10</sub>                    | 442.379  | 6.51 Flavanol          | "130405-40-2" | 141400   | 438600   | 42400     | 117900   | 1838000  | 21220     |
| 212 | Isomucronulatol-7-O-glucoside                 | C <sub>23</sub> H <sub>28</sub> O <sub>10</sub>                    | 464.469  | 6.53 Flavonoids        | "94367-43-8"  | 2058000  | 1769000  | 12660000  | 2025000  | 4093000  | 20490000  |
| 213 | p-Hydroxy-cinnamic acid                       | C <sub>9</sub> H <sub>8</sub> O <sub>3</sub>                       | 164.16   | 6.531 Phenylpropanoids | "7400-08-0"   | 2234000  | 21380000 | 176900000 | 2245000  | 30000000 | 241200000 |
| 214 | Isovitexin                                    | C <sub>21</sub> H <sub>20</sub> O <sub>10</sub>                    | 432.378  | 6.533 Flavones         | "29702-25-8"  | 1930000  | 169800   | 175200    | 2567000  | 241300   | 150900    |
| 215 | Rosmarinic acid-3'-O-glucoside                | C <sub>24</sub> H <sub>26</sub> O <sub>13</sub>                    | 522.137  | 6.54 Polyphenol        | "910028-78-3" | 260300   | 1872000  | 485000    | 294000   | 1425000  | 952300    |
| 216 | Ellagic acid                                  | C <sub>14</sub> H <sub>6</sub> O <sub>8</sub>                      | 302.19   | 6.54 Polyphenol        | "476-66-4"    | 23230000 | 49960000 | 39540000  | 22510000 | 89740000 | 51590000  |
| 217 | Epicatechin Gallate                           | C <sub>22</sub> H <sub>18</sub> O <sub>10</sub>                    | 442.379  | 6.54 Flavonoids        | "1257-08-5"   | 123700   | 361300   | 46490     | 103900   | 1332000  | 19880     |
| 218 | Myricitrin                                    | C <sub>21</sub> H <sub>20</sub> O <sub>12</sub>                    | 464.38   | 6.547 Flavonols        | "17912-87-7"  | 2062000  | 1987000  | 14950000  | 1934000  | 4458000  | 22510000  |
| 219 | p-Coumaric Acid                               | C <sub>9</sub> H <sub>8</sub> O <sub>3</sub>                       | 164.16   | 6.549 Phenylpropanoids | "501-98-4"    | 2347000  | 25940000 | 178000000 | 2403000  | 33690000 | 210800000 |
| 220 | Kaempferol 3-O-robinobioside                  | C <sub>27</sub> H <sub>30</sub> O <sub>15</sub>                    | 594.159  | 6.55 Flavonols         | "17297-56-2"  | 11580000 | 11180000 | 23700000  | 11810000 | 27030000 | 47070000  |
| 221 | Hyperoside                                    | C <sub>21</sub> H <sub>20</sub> O <sub>12</sub>                    | 464.38   | 6.554 Flavonols        | "482-36-0"    | 1749000  | 1521000  | 11720000  | 1801000  | 3248000  | 18190000  |
| 222 | Vitexin                                       | C <sub>21</sub> H <sub>20</sub> O <sub>10</sub>                    | 432.38   | 6.559 Flavones         | "3681-93-4"   | 1704000  | 152700   | 178600    | 2232000  | 231000   | 181000    |
| 223 | Icariside E5                                  | C <sub>26</sub> H <sub>34</sub> O <sub>11</sub>                    | 522.21   | 6.56 Phenylpropanoids  | "126176-79-2" | 170100   | 1128000  | 507300    | 213500   | 1362000  | 701300    |
| 224 | Lariciresinol-4'-O-glucoside                  | C <sub>26</sub> H <sub>34</sub> O <sub>11</sub>                    | 522.211  | 6.56 Lignans           | "143663-00-7" | 213500   | 1208000  | 420000    | 278300   | 1311000  | 630100    |
| 225 | Tricin O-saccharic acid                       | C <sub>23</sub> H <sub>22</sub> O <sub>14</sub>                    | 522.1    | 6.58 Flavonoids        |               | 1204000  | 8197000  | 2834000   | 1336000  | 8167000  | 3972000   |
| 226 | Rehmannioside D                               | C <sub>27</sub> H <sub>42</sub> O <sub>20</sub>                    | 686.6177 | 6.58 Terpenoids        | "81720-08-3"  | 21550    | 2432     | 5440      | 50190    | 11500    | 19802     |
| 227 | Somellarin                                    | C <sub>21</sub> H <sub>18</sub> O <sub>12</sub>                    | 462.36   | 6.59 Flavonoids        | "27740-01-8"  | 67480    | 6168     | 85360     | 50390    | 23750    | 108400    |
| 228 | Isotrifoloin                                  | C <sub>21</sub> H <sub>20</sub> O <sub>12</sub>                    | 464.096  | 6.59 Flavonoids        | "21637-25-2"  | 3324000  | 2778000  | 20740000  | 2722000  | 6343000  | 32430000  |
| 229 | Spiraeoside                                   | C <sub>21</sub> H <sub>20</sub> O <sub>12</sub>                    | 464.096  | 6.59 Flavonoids        | "20229-56-5"  | 3310000  | 3105000  | 22160000  | 3138000  | 6637000  | 34230000  |
| 230 | Isoquercitrin                                 | C <sub>21</sub> H <sub>20</sub> O <sub>12</sub>                    | 464.38   | 6.596 Flavonols        | "482-35-9"    | 4085000  | 4378000  | 29170000  | 3704000  | 9518000  | 45500000  |
| 231 | Ethyl gallate                                 | C <sub>9</sub> H <sub>10</sub> O <sub>5</sub>                      | 198.17   | 6.611 Benzoic acids    | "831-61-8"    | 291400   | 9340000  | 207700    | 340700   | 23550000 | 456900    |
| 232 | Trifolin                                      | C <sub>21</sub> H <sub>20</sub> O <sub>11</sub>                    | 448.101  | 6.62 Flavonoids        | "23627-87-4"  | 979100   | 1131000  | 54980000  | 1150000  | 1430000  | 67890000  |
| 233 | 1-Hydroxypinoresinol-1-O-Glucoside            | C <sub>26</sub> H <sub>32</sub> O <sub>12</sub>                    | 536.189  | 6.62 Lignans           | "81495-71-8"  | 32780    | 51980    | 23610     | 35260    | 128100   | 47340     |
| 234 | Kaempferitrin                                 | C <sub>27</sub> H <sub>30</sub> O <sub>14</sub>                    | 578.519  | 6.641 Flavonols        | "482-38-2"    | 35137    | 105609   | 215900    | 6981     | 127880   | 359800    |
| 235 | Octanedioic acid                              | C <sub>8</sub> H <sub>14</sub> O <sub>4</sub>                      | 174.19   | 6.649 Organic Acids    | "505-48-6"    | 708500   | 515200   | 6398000   | 879100   | 780000   | 18480000  |
| 236 | Kaempferol7-O-beta-D-glucopyranoside          | C <sub>21</sub> H <sub>20</sub> O <sub>11</sub>                    | 448.377  | 6.65 Flavonols         | "16290-07-6"  | 775400   | 597300   | 61670000  | 853700   | 823000   | 69220000  |
| 237 | Luteolin 7-O-glucoside                        | C <sub>21</sub> H <sub>20</sub> O <sub>11</sub>                    | 448.38   | 6.664 Flavonoids       | "5373-11-5"   | 1103000  | 1307000  | 60150000  | 1155000  | 1821000  | 72220000  |
| 238 | Apigenin 5-O-glucoside                        | C <sub>21</sub> H <sub>20</sub> O <sub>10</sub>                    | 432.38   | 6.68 Flavonoids        | "28757-27-9"  | 60060    | 18538    | 26350     | 98040    | 40470    | 47700     |
| 239 | Kaji-ichigoside F1                            | C <sub>36</sub> H <sub>58</sub> O <sub>10</sub>                    | 650.85   | 6.71 Terpenoids        | "95298-47-8"  | 454500   | 16800    | 220600    | 419500   | 63080    | 91660     |
| 240 | Lonicerin                                     | C <sub>27</sub> H <sub>30</sub> O <sub>15</sub>                    | 594.526  | 6.73 Flavonoids        | "20633-84-5"  | 14130000 | 11480000 | 26080000  | 12810000 | 28070000 | 47600000  |
| 241 | Hydroferulic acid                             | C <sub>10</sub> H <sub>12</sub> O <sub>4</sub>                     | 196.2    | 6.74 Phenylpropanoids  | "1135-23-5"   | 972400   | 272000   | 468700    | 1764000  | 561700   | 297928    |
| 242 | Astilbin                                      | C <sub>21</sub> H <sub>22</sub> O <sub>11</sub>                    | 450.39   | 6.745 Flavonoids       | "29838-67-3"  | 88860    | 15380    | 235400    | 71260    | 46260    | 179400    |
| 243 | Wikstromol                                    | C <sub>20</sub> H <sub>22</sub> O <sub>7</sub>                     | 374.39   | 6.78 Lignans           | "61521-74-2"  | 119181   | 27928    | 57080     | 163085   | 23930    | 105700    |
| 244 | Sesamol                                       | C <sub>7</sub> H <sub>6</sub> O <sub>3</sub>                       | 138.12   | 6.79 Polyphenol        | "533-31-3"    | 9482     | 4241     | 35260     | 7511     | 17267    | 54690     |
| 245 | Isorhamnetin-3-O-neohesperidoside             | C <sub>28</sub> H <sub>32</sub> O <sub>16</sub>                    | 624.552  | 6.79 Flavonoids        | "55033-90-4"  | 69610    | 51460    | 76050     | 63150    | 157100   | 104200    |

|     |                                    |                                                  |         |                        |              |           |         |          |           |          |          |
|-----|------------------------------------|--------------------------------------------------|---------|------------------------|--------------|-----------|---------|----------|-----------|----------|----------|
| 246 | 3-Phenyllactic acid                | C <sub>9</sub> H <sub>10</sub> O <sub>3</sub>    | 166.174 | 6.81 Organic Acids     | "828-01-3"   | 991100    | 60500   | 243400   | 1395000   | 154900   | 753900   |
| 247 | Narirutin                          | C <sub>27</sub> H <sub>32</sub> O <sub>14</sub>  | 580.535 | 6.837 Flavonones       | "14259-46-2" | 119300    | 38480   | 10380    | 42060     | 60500    | 68138    |
| 248 | Tectoridin                         | C <sub>22</sub> H <sub>22</sub> O <sub>11</sub>  | 462.4   | 6.864 Isoflavonoids    | "611-40-5"   | 162300    | 44440   | 136800   | 173700    | 117900   | 195200   |
| 249 | Antiarol                           | C <sub>9</sub> H <sub>12</sub> O <sub>4</sub>    | 184.19  | 6.88 Polyphenol        | "642-71-7"   | 216100    | 7677    | 47382    | 245800    | 9756     | 100457   |
| 250 | Ferulic Acid                       | C <sub>10</sub> H <sub>10</sub> O <sub>4</sub>   | 194.19  | 6.881 Polyphenol       | "1135-24-6"  | 444500    | 3451000 | 27500000 | 517000    | 3084000  | 50170000 |
| 251 | Taxifolin                          | C <sub>15</sub> H <sub>12</sub> O <sub>7</sub>   | 304.25  | 6.885 Flavonoids       | "480-18-2"   | 393100    | 363500  | 415200   | 554600    | 1260000  | 653800   |
| 252 | Pelargonidin chloride              | C <sub>15</sub> H <sub>11</sub> ClO <sub>5</sub> | 306.7   | 6.91 Anthocyanins      | "134-04-3"   | 19350     | 121100  | 121400   | 124454    | 889600   | 24990    |
| 253 | Pheophorbide A                     | C <sub>35</sub> H <sub>36</sub> NaO <sub>5</sub> | 592.684 | 6.93 Organic Acids     | "15664-29-6" | 35770     | 12960   | 24080    | 39630     | 11660    | 25940    |
| 254 | Rhapontin                          | C <sub>21</sub> H <sub>24</sub> O <sub>9</sub>   | 420.41  | 6.94 Phenylpropanoids  | "155-58-8"   | 105550    | 73600   | 46700    | 121487    | 73280    | 115000   |
| 255 | Lirioresinol A                     | C <sub>22</sub> H <sub>26</sub> O <sub>8</sub>   | 418.162 | 6.96 Lignans           | "21453-71-4" | 20640     | 292300  | 63650    | 30880     | 82660    | 96970    |
| 256 | Methyl protocatechuate             | C <sub>8</sub> H <sub>8</sub> O <sub>4</sub>     | 168.15  | 6.97 Benzoic acids     | "2150-43-8"  | 1020000   | 2064000 | 687900   | 1531000   | 3701000  | 1925000  |
| 257 | Vincetoxicoside B                  | C <sub>21</sub> H <sub>20</sub> O <sub>11</sub>  | 448.383 | 6.97 Flavonoids        | "22007-72-3" | 1271000   | 375100  | 4226000  | 962700    | 792000   | 3171000  |
| 258 | Naringin                           | C <sub>27</sub> H <sub>32</sub> O <sub>14</sub>  | 580.53  | 6.979 Flavonones       | "10236-47-2" | 101400    | 35920   | 29000    | 61270     | 33320    | 61860    |
| 259 | 3-Hydroxycinnamic acid             | C <sub>9</sub> H <sub>8</sub> O <sub>3</sub>     | 164.16  | 6.98 Phenylpropanoids  | "14755-02-3" | 5011710   | 3829000 | 25750000 | 5258400   | 12403800 | 67800000 |
| 260 | Liquiritin                         | C <sub>21</sub> H <sub>22</sub> O <sub>9</sub>   | 418.39  | 6.98 Flavonones        | "551-15-5"   | 164877    | 13710   | 123600   | 207717    | 14070    | 247100   |
| 261 | Piceatannol                        | C <sub>14</sub> H <sub>12</sub> O <sub>4</sub>   | 244.24  | 6.987 Phenylpropanoids | "10083-24-6" | 57517     | 44580   | 56540    | 79769     | 120300   | 174200   |
| 262 | Coniferyl Alcohol                  | C <sub>10</sub> H <sub>12</sub> O <sub>3</sub>   | 180.2   | 7.05 Polyphenol        | "458-35-5"   | 41910     | 34510   | 70070    | 41550     | 86450    | 173600   |
| 263 | Pinobanksin                        | C <sub>15</sub> H <sub>12</sub> O <sub>5</sub>   | 272.069 | 7.06 Flavonoids        | "548-82-3"   | 387000    | 16910   | 146200   | 503200    | 58690    | 139100   |
| 264 | Kaempferol 3-A-L-Arabinopyranoside | C <sub>20</sub> H <sub>18</sub> O <sub>10</sub>  | 418.351 | 7.08 Flavonoids        | "99882-10-7" | 46390     | 42790   | 844000   | 22870     | 66490    | 1216000  |
| 265 | Engeletin                          | C <sub>21</sub> H <sub>22</sub> O <sub>10</sub>  | 434.393 | 7.149 Flavonoids       | "572-31-6"   | 251100    | 18740   | 62850    | 396500    | 62170    | 47820    |
| 266 | Theaflavin                         | C <sub>20</sub> H <sub>24</sub> O <sub>12</sub>  | 564.502 | 7.16 Flavonoids        | "4670-05-7"  | 42258     | 34260   | 34942    | 11360     | 18740    | 64240    |
| 267 | (+)-Isolariciresinol               | C <sub>20</sub> H <sub>24</sub> O <sub>6</sub>   | 360.407 | 7.21 Lignans           | "548-29-8"   | 22660     | 14206   | 31170    | 63470     | 6717     | 23340    |
| 268 | Pinoresinol-glucoside              | C <sub>26</sub> H <sub>32</sub> O <sub>11</sub>  | 520.526 | 7.23 Lignans           | "69251-96-3" | 135403    | 47420   | 159900   | 162099    | 63540    | 227600   |
| 269 | Quercitrin                         | C <sub>21</sub> H <sub>20</sub> O <sub>11</sub>  | 448.38  | 7.24 Flavonols         | "522-12-3"   | 2899000   | 792400  | 9078000  | 2602000   | 1549000  | 6855000  |
| 270 | Phlorizin                          | C <sub>21</sub> H <sub>24</sub> O <sub>10</sub>  | 436.41  | 7.24 Flavonoids        | "60-81-1"    | 33094     | 118700  | 88740    | 25750     | 172200   | 64190    |
| 271 | Coniferylaldehyde                  | C <sub>10</sub> H <sub>10</sub> O <sub>3</sub>   | 178.063 | 7.29 Polyphenol        | "20649-42-7" | 325200    | 51840   | 478700   | 442000    | 35520    | 2050000  |
| 272 | alpha-Zearalanol                   | C <sub>18</sub> H <sub>26</sub> O <sub>3</sub>   | 322.396 | 7.3 Phenylpropanoids   | "26538-44-3" | 296500    | 333417  | 343300   | 307300    | 627100   | 511800   |
| 273 | Azaleatin                          | C <sub>16</sub> H <sub>12</sub> O <sub>7</sub>   | 316.265 | 7.3 Flavonols          | "529-51-1"   | 1839000   | 122800  | 934800   | 1805000   | 238800   | 1941000  |
| 274 | Ayapin                             | C <sub>11</sub> H <sub>8</sub> O <sub>5</sub>    | 188.041 | 7.3 Coumarins          | "494-56-4"   | 2112000   | 743500  | 12310000 | 2788000   | 1323000  | 28840000 |
| 275 | Eucommiol                          | C <sub>9</sub> H <sub>16</sub> O <sub>4</sub>    | 188.105 | 7.31 Terpenoids        | "55930-44-4" | 8314000   | 3603000 | 36460000 | 10450000  | 5925000  | 70930000 |
| 276 | Gossypetin                         | C <sub>15</sub> H <sub>10</sub> O <sub>8</sub>   | 318.24  | 7.34 Flavonols         | "489-35-0"   | 409500    | 41580   | 96270    | 437200    | 57650    | 95290    |
| 277 | Myricetin                          | C <sub>15</sub> H <sub>10</sub> O <sub>8</sub>   | 318.24  | 7.34 Flavonols         | "529-44-2"   | 553600    | 71410   | 207400   | 647800    | 142100   | 253500   |
| 278 | Kaempferin                         | C <sub>21</sub> H <sub>20</sub> O <sub>10</sub>  | 432.106 | 7.35 Flavonoids        | "482-39-3"   | 473700    | 88210   | 539900   | 389300    | 262700   | 471200   |
| 279 | Kaempferol 7-O-rhamnoside          | C <sub>21</sub> H <sub>20</sub> O <sub>10</sub>  | 432.106 | 7.36 Flavonols         | "20196-89-8" | 567300    | 100500  | 722000   | 462700    | 321700   | 582000   |
| 280 | Matairesinoside                    | C <sub>26</sub> H <sub>32</sub> O <sub>11</sub>  | 520.533 | 7.38 Lignans           | "23202-85-9" | 8651      | 30760   | 69730    | 21510     | 98910    | 217500   |
| 281 | Ginsenoside Re                     | C <sub>48</sub> H <sub>82</sub> O <sub>18</sub>  | 947.15  | 7.43 Terpenoids        | "52286-59-6" | 13481     | 5395    | 7385     | 14510     | 5866     | 27390    |
| 282 | 8-O-Methylretusin                  | C <sub>17</sub> H <sub>14</sub> O <sub>5</sub>   | 298.295 | 7.49 Isoflavonoids     | "37816-20-9" | 5332      | 11043   | 5637     | 3942      | 13452    | 40030    |
| 283 | Trilobatin                         | C <sub>21</sub> H <sub>24</sub> O <sub>10</sub>  | 436.409 | 7.523 Dihydrochalcones | "4192-90-9"  | 99715     | 80560   | 63730    | 96491     | 122300   | 50970    |
| 284 | Methyl-Hesperidin                  | C <sub>29</sub> H <sub>38</sub> O <sub>16</sub>  | 642.59  | 7.569 Flavonoids       | "11013-97-1" | 262200    | 58914   | 67416    | 260900    | 82168    | 174383   |
| 285 | Baicalin                           | C <sub>21</sub> H <sub>18</sub> O <sub>11</sub>  | 446.36  | 7.575 Flavones         | "21967-41-9" | 20420     | 8067    | 8598     | 22370     | 7487     | 8608     |
| 286 | Veratric acid                      | C <sub>9</sub> H <sub>10</sub> O <sub>4</sub>    | 182.17  | 7.65 Benzoic acids     | "93-07-2"    | 6137      | 2573    | 6641     | 16850     | 15620    | 5827     |
| 287 | Isovanillin                        | C <sub>8</sub> H <sub>8</sub> O <sub>3</sub>     | 152.15  | 7.676 Polyphenol       | "621-59-0"   | 66560     | 65420   | 48350    | 65860     | 725500   | 87010    |
| 288 | Tiliroside                         | C <sub>30</sub> H <sub>26</sub> O <sub>13</sub>  | 594.52  | 7.879 Flavonols        | "20316-62-5" | 14950000  | 233200  | 321900   | 15320000  | 163600   | 135300   |
| 289 | Trifolirhizin                      | C <sub>22</sub> H <sub>22</sub> O <sub>10</sub>  | 446.404 | 7.98 Isoflavonoids     | "6807-83-6"  | 2309      | 8029    | 6528     | 5576      | 24160    | 4483     |
| 290 | Eriodictyol                        | C <sub>15</sub> H <sub>12</sub> O <sub>6</sub>   | 288.252 | 7.999 Flavonones       | "552-58-9"   | 639800    | 38480   | 41370    | 760200    | 49850    | 49160    |
| 291 | 2'-Hydroxygenistein                | C <sub>15</sub> H <sub>12</sub> O <sub>6</sub>   | 286.048 | 8.02 Isoflavonoids     | "1156-78-1"  | 58570     | 23546   | 29167    | 86530     | 47538    | 96310    |
| 292 | Poncirin                           | C <sub>28</sub> H <sub>34</sub> O <sub>14</sub>  | 594.561 | 8.049 Flavonones       | "14941-08-3" | 8054000   | 337500  | 251500   | 8353000   | 135400   | 67340    |
| 293 | Morin                              | C <sub>15</sub> H <sub>10</sub> O <sub>7</sub>   | 302.043 | 8.05 Flavonoids        | "6472-38-4"  | 203500000 | 6062000 | 34590000 | 207700000 | 42810000 | 45990000 |
| 294 | Luteolin                           | C <sub>15</sub> H <sub>10</sub> O <sub>6</sub>   | 286.24  | 8.06 Flavones          | "491-70-3"   | 182500    | 24670   | 25920    | 260000    | 40370    | 275800   |

|     |                                                         |                                                 |          |                        |                |          |         |          |          |         |          |
|-----|---------------------------------------------------------|-------------------------------------------------|----------|------------------------|----------------|----------|---------|----------|----------|---------|----------|
| 295 | Aleuritic Acid                                          | C <sub>16</sub> H <sub>32</sub> O <sub>5</sub>  | 304.42   | 8.09 Organic Acids     | "533-87-9"     | 260500   | 6989    | 602400   | 364800   | 26990   | 1442000  |
| 296 | Harpagoside                                             | C <sub>24</sub> H <sub>30</sub> O <sub>11</sub> | 494.488  | 8.099 Terpenoids       | "19210-12-9"   | 271100   | 60450   | 163000   | 274900   | 251200  | 291900   |
| 297 | Sebacic acid                                            | C <sub>10</sub> H <sub>18</sub> O <sub>4</sub>  | 202.248  | 8.111 Organic Acids    | "111-20-6"     | 2472000  | 1473000 | 12000000 | 3111000  | 2709000 | 32190000 |
| 298 | Wedelolactone                                           | C <sub>16</sub> H <sub>10</sub> O <sub>7</sub>  | 314.246  | 8.229 Flavonoids       | "524-12-9"     | 127907   | 17170   | 30830    | 106731   | 69020   | 40717    |
| 299 | Wogonoside                                              | C <sub>22</sub> H <sub>20</sub> O <sub>11</sub> | 460.388  | 8.26 Flavonoids        | "51059-44-0"   | 2841     | 9384    | 5150     | 7740     | 18570   | 15627    |
| 300 | Ethyl caffeate                                          | C <sub>11</sub> H <sub>12</sub> O <sub>4</sub>  | 208.211  | 8.507 Phenylpropanoids | "102-37-4"     | 10792    | 2717    | 2034     | 3166     | 54230   | 2985     |
| 301 | trans-Cinnamic acid                                     | C <sub>9</sub> H <sub>8</sub> O <sub>2</sub>    | 148.16   | 8.507 Phenylpropanoids | "140-10-3"     | 8504     | 7054    | 4195     | 9573     | 7890    | 5668     |
| 302 | Naringenin chalcone                                     | C <sub>15</sub> H <sub>12</sub> O <sub>5</sub>  | 272.253  | 8.518 Chalcones        | "73692-50-9"   | 5067000  | 303800  | 392400   | 5591000  | 647200  | 292900   |
| 303 | 4-Methoxycinnamic acid                                  | C <sub>10</sub> H <sub>10</sub> O <sub>3</sub>  | 178      | 8.56 Phenylpropanoids  | "830-09-1"     | 50250    | 16540   | 519800   | 38720    | 1088000 | 1480000  |
| 304 | Butin                                                   | C <sub>15</sub> H <sub>12</sub> O <sub>5</sub>  | 272.069  | 8.61 Flavanones        | "492-14-8"     | 3180000  | 198900  | 279700   | 3401000  | 440900  | 211000   |
| 305 | 5,6-Dehydroginsenoside Rd                               | C <sub>48</sub> H <sub>80</sub> O <sub>18</sub> | 945.152  | 8.61 Terpenoids        | "1268459-68-2" | 13750    | 28850   | 6934     | 5526     | 63000   | 10290    |
| 306 | Ginsenoside Rb1                                         | C <sub>54</sub> H <sub>92</sub> O <sub>23</sub> | 1109.295 | 8.63 Terpenoids        | "41753-43-9"   | 52090    | 14880   | 17064    | 47590    | 35530   | 53971    |
| 307 | Naringenin                                              | C <sub>15</sub> H <sub>12</sub> O <sub>5</sub>  | 272.25   | 8.683 Flavanones       | "480-41-1"     | 1140000  | 64380   | 92490    | 1209000  | 147700  | 83540    |
| 308 | Apigenin                                                | C <sub>15</sub> H <sub>10</sub> O <sub>5</sub>  | 270.24   | 8.7 Flavones           | "520-36-5"     | 396700   | 30440   | 28520    | 489700   | 74450   | 41720    |
| 309 | Ethylparaben                                            | C <sub>9</sub> H <sub>10</sub> O <sub>3</sub>   | 166.17   | 8.703 Polyphenol       | "120-47-8"     | 16160    | 29470   | 7311     | 34270    | 363300  | 8252     |
| 310 | Genistein                                               | C <sub>15</sub> H <sub>10</sub> O <sub>5</sub>  | 270.24   | 8.72 Isoflavonoids     | "446-72-0"     | 119400   | 1947    | 19436    | 95620    | 6499    | 51449    |
| 311 | Methyl 4-hydroxycinnamate                               | C <sub>10</sub> H <sub>10</sub> O <sub>3</sub>  | 178.18   | 8.76 Phenylpropanoids  | "19367-38-5"   | 317600   | 119500  | 3151000  | 289200   | 6653000 | 7004000  |
| 312 | Croctein                                                | C <sub>20</sub> H <sub>24</sub> O <sub>4</sub>  | 328.408  | 8.79 Terpenoids        | "27876-94-4"   | 172590   | 45780   | 74550    | 232147   | 15750   | 357800   |
| 313 | Kaempferol                                              | C <sub>15</sub> H <sub>10</sub> O <sub>6</sub>  | 286.24   | 8.811 Flavonols        | "520-18-3"     | 12560000 | 290100  | 2681000  | 13170000 | 2052000 | 3843000  |
| 314 | 7-O-Methylioriodyl                                      | C <sub>16</sub> H <sub>14</sub> O <sub>6</sub>  | 302.079  | 8.86 Flavonoids        | "51857-11-5"   | 89360    | 8616    | 15180    | 99050    | 24770   | 29630    |
| 315 | Ginsenoside-Ro                                          | C <sub>48</sub> H <sub>76</sub> O <sub>19</sub> | 957.119  | 8.86 Terpenoids        | "34367-04-9"   | 143600   | 270100  | 46800    | 124200   | 865300  | 201000   |
| 316 | Diosmetin                                               | C <sub>16</sub> H <sub>12</sub> O <sub>6</sub>  | 300.26   | 8.911 Flavones         | "520-34-3"     | 556700   | 49230   | 39570    | 643800   | 75770   | 56620    |
| 317 | Gardenoside                                             | C <sub>17</sub> H <sub>24</sub> O <sub>11</sub> | 404.366  | 8.92 Terpenoids        | "24512-62-7"   | 89125    | 15880   | 26170    | 105422   | 29694   | 140300   |
| 318 | Isorhamnetin                                            | C <sub>16</sub> H <sub>12</sub> O <sub>7</sub>  | 316.262  | 8.969 Flavonols        | "480-19-3"     | 606500   | 4657    | 66010    | 703000   | 24690   | 71630    |
| 319 | Picropodophyllin                                        | C <sub>22</sub> H <sub>22</sub> O <sub>8</sub>  | 414.41   | 9.16 Lignans           | "477-47-4"     | 6884     | 7386    | 6111     | 3755     | 2470    | 12966    |
| 320 | 4-Chloro-2-hydroxybenzoic acid, 4-chloro salicylic acid | C <sub>7</sub> H <sub>5</sub> ClO <sub>3</sub>  | 172.57   | 9.167 Benzoic acids    | "5106-98-9"    | 96405    | 11210   | 31850    | 120301   | 14480   | 120300   |
| 321 | Steviolbioside                                          | C <sub>32</sub> H <sub>50</sub> O <sub>13</sub> | 642.732  | 9.17 Terpenoids        | "41093-60-1"   | 64460    | 17771   | 1425     | 90650    | 28720   | 19760    |
| 322 | Ginsenoside Rd                                          | C <sub>48</sub> H <sub>82</sub> O <sub>18</sub> | 947.154  | 9.33 Terpenoids        | "52705-93-8"   | 6865     | 22110   | 5013     | 16978    | 9496    | 4825     |
| 323 | Chikusetsusponin Iva                                    | C <sub>42</sub> H <sub>66</sub> O <sub>14</sub> | 794.977  | 9.34 Terpenoids        | "51415-02-2"   | 17080    | 2380    | 3192     | 21120    | 10120   | 12030    |
| 324 | p-Coumaric acid ethyl ester                             | C <sub>11</sub> H <sub>12</sub> O <sub>3</sub>  | 192.21   | 9.387 Phenylpropanoids | "7362-39-2"    | 10070    | 36353   | 7219     | 15130    | 123000  | 18630    |
| 325 | Aurantio-obtusin                                        | C <sub>17</sub> H <sub>14</sub> O <sub>7</sub>  | 330.289  | 9.734 Quinones         | "67979-25-3"   | 270200   | 23630   | 388100   | 306500   | 20690   | 971900   |
| 326 | Ethyl ferulate                                          | C <sub>12</sub> H <sub>14</sub> O <sub>4</sub>  | 222.24   | 9.8 Phenylpropanoids   | "4046-02-0"    | 2184     | 9348    | 3746     | 4696     | 28930   | 14520    |
| 327 | Orcinol glucoside                                       | C <sub>13</sub> H <sub>18</sub> O <sub>7</sub>  | 286.28   | 9.914 Polyphenol       | "21082-33-7"   | 864300   | 4264000 | 1909000  | 833600   | 6275000 | 3134000  |
